# Supplementary material for: 13 C NMR spectroscopy of heterocycles: 1-phenyl-3-aryl/ t -butyl-5-arylpyrazoles
Source: publisher site journal article supplement (doi:10.1515/hc-2017-0034), 2017-03-30
Supplement: Supplementary file 1 [file hc-2017-0034_suppl.docx]

**13C NMR Spectroscopy of heterocycles: 1-phenyl-3-aryl/t-butyl-5-arylpyrazoles**

Amy N. Hockstedler, Beatrice A. Edjah, Saajid Z. Azhar, Hadrian Mendoza, Nicole A. Brown, Hayley B. Arrowood, Andrew C. Clay, Anand B. Shah, Glenda M. Duffek, Jianmei Cui and A.L. Baumstark*

Department of Chemistry, Center for Biotech and Drug Design, Georgia State University, Atlanta, Georgia 30302-4098, USA

*Corresponding author, email: [abaumstark@gsu.edu](mailto:abaumstark@gsu.edu)

**Supplementary material**


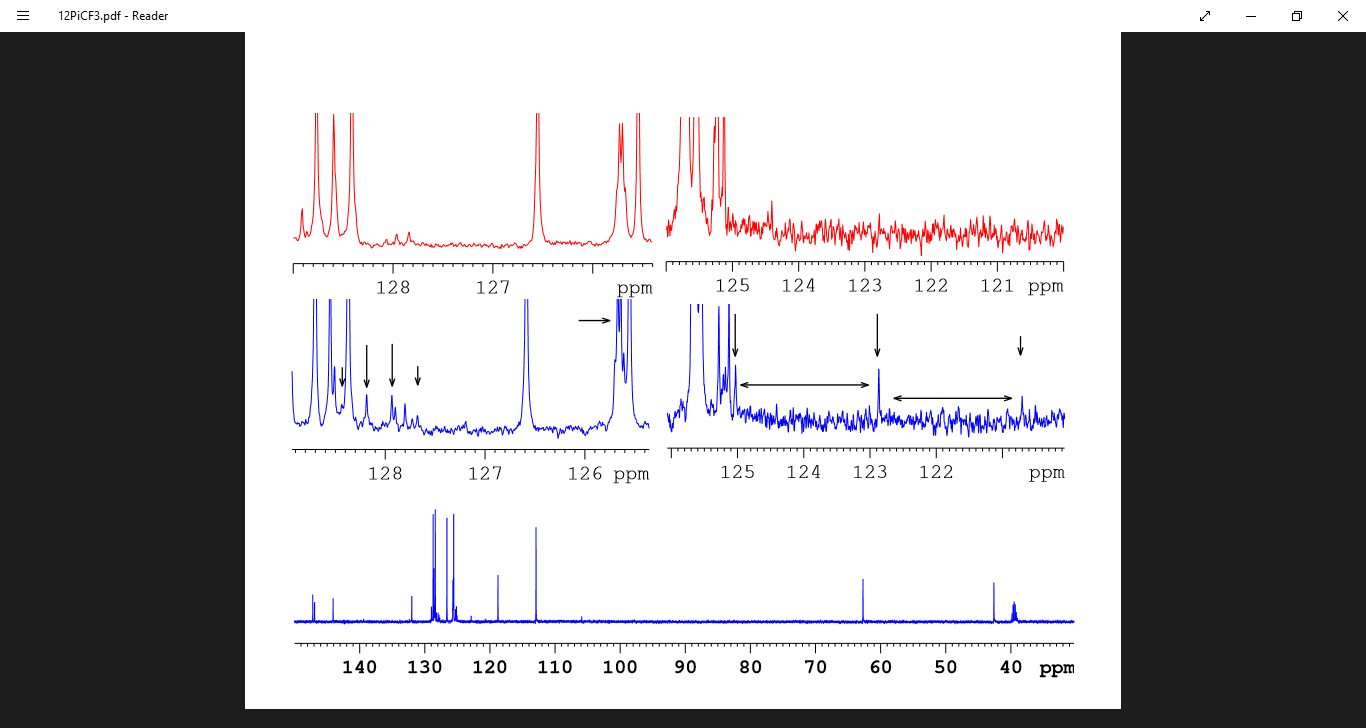


**Figure S1** 13C decoupled spectra (blue, bottom spectrum) and 13C DEPT 135 (red, expanded inset) of 1,3-Diphenyl-5-(4-trifluorophenyl)pyrazoline (**12Pi**) used to located the CF3 group and determine J values.
